# Supplementary material for: Korea hypertension fact sheet 2020: analysis of nationwide population-based data
Source: Springer Nature journal article supplement (doi:10.1186/s40885-021-00166-2), 2021-03-15
Supplement: MOESM1 [file 25790028]

# KOREA HYPERTENSION FACT SHEET 2020

The Korean Society of Hypertension

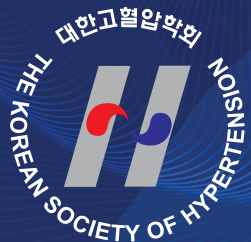

## Korea National Health and Nutrition Examination Survey

|                                      |                                             |                                                                                                                                               |
|--------------------------------------|---------------------------------------------|-----------------------------------------------------------------------------------------------------------------------------------------------|
| <b>Subjects</b>                      | Adults age 20 years or older / 1998 to 2018 |                                                                                                                                               |
| <b>Blood pressure classification</b> | <b>Hypertension</b>                         | ① Systolic blood pressure (SBP) $\geq 140$ mmHg, or<br>② Diastolic blood pressure (DBP) $\geq 90$ mmHg, or<br>③ taking antihypertensive drugs |
|                                      | <b>Prehypertension</b>                      | ① SBP 130-139 mmHg or<br>② DBP 80-89 mmHg; and<br>③ not meeting criteria for hypertension                                                     |
| <b>Management indices</b>            | <b>Awareness rate</b>                       | Proportion of people with physician diagnosis of hypertension among people with hypertension                                                  |
|                                      | <b>Treatment rate</b>                       | Proportion of people taking antihypertensives for $\geq 20$ days/month among people with hypertension                                         |
|                                      | <b>Control rate</b><br>(among prevalent)    | Proportion of people with SBP $< 140$ mmHg and DBP $< 90$ mmHg among people with hypertension                                                 |
|                                      | <b>Control rate</b><br>(among treated)      | Proportion of people with SBP $< 140$ mmHg and DBP $< 90$ mmHg among people taking antihypertensives                                          |

## Korea National Health Insurance Big Data

|                                   |                                             |                                                                                                                                                                                                                                                                                           |
|-----------------------------------|---------------------------------------------|-------------------------------------------------------------------------------------------------------------------------------------------------------------------------------------------------------------------------------------------------------------------------------------------|
| <b>Subjects</b>                   | Adults age 20 years or older / 2002 to 2018 |                                                                                                                                                                                                                                                                                           |
| <b>Healthcare utilization</b>     | <b>Diagnosis</b>                            | $\geq 1$ health insurance claim for hypertension diagnosis (ICD-10: I10) each year                                                                                                                                                                                                        |
|                                   | <b>Treatment</b>                            | $\geq 1$ health insurance claim for hypertension diagnosis and antihypertensive drug prescription each year                                                                                                                                                                               |
|                                   | <b>Adherence</b>                            | Prescription of antihypertensive drugs $\geq 290$ days (80%) each year                                                                                                                                                                                                                    |
|                                   | <b>Blood test</b>                           | $\geq 1$ serum creatinine test each year                                                                                                                                                                                                                                                  |
|                                   | <b>Urine test</b>                           | $\geq 1$ routine urinalysis or urine microalbumin test each year                                                                                                                                                                                                                          |
| <b>Treatment for hypertension</b> | <b>Regimen</b>                              | The combination of antihypertensive classes in a prescription; if the regimen is switched, one with the longest duration is selected for a given year.                                                                                                                                    |
|                                   | <b>Antihypertensive drug class</b>          | Diuretics (DU; thiazide-related diuretics, loop diuretics), beta-blockers (BB), calcium channel blockers (CCB), angiotensin converting enzyme inhibitors (ACEi), angiotensin receptor blockers (ARB), potassium-sparing diuretics (PSD), Others (OTH; alpha-blockers, vasodilators, etc.) |

## Contents

4 Summary of population statistics

6 Summary of treatment statistics

### **Changes in population mean blood pressure and prevalence of hypertension**

9 Changes in population mean blood pressure

10 Changes in hypertension prevalence

11 Changes in hypertension prevalence by sex and age

### **Changes in hypertension management indices**

13 Changes in hypertension awareness rate by sex and age

14 Changes in hypertension treatment rate by sex and age

15 Changes in hypertension control rate (among prevalent) by sex and age

16 Changes in hypertension control rate (among treated) by sex and age

### **Healthcare utilization for hypertension**

18 Changes in the number of healthcare users

19 Changes in co-treatment for dyslipidemia and diabetes

20 Changes in prescriptions of antihypertensive drugs

22 Changes in antihypertensive treatment regimen

### **Management of hypertension in young adults**

25 Summary of hypertension statistics in young adults

26 Changes in awareness rate in young adults

27 Changes in treatment rate in young adults

28 Changes in adherence rate (among diagnosed) in young adults

29 Changes in adherence rate (among treated) in young adults

30 Current management status in young adults

# Summary of population statistics (age 20+)

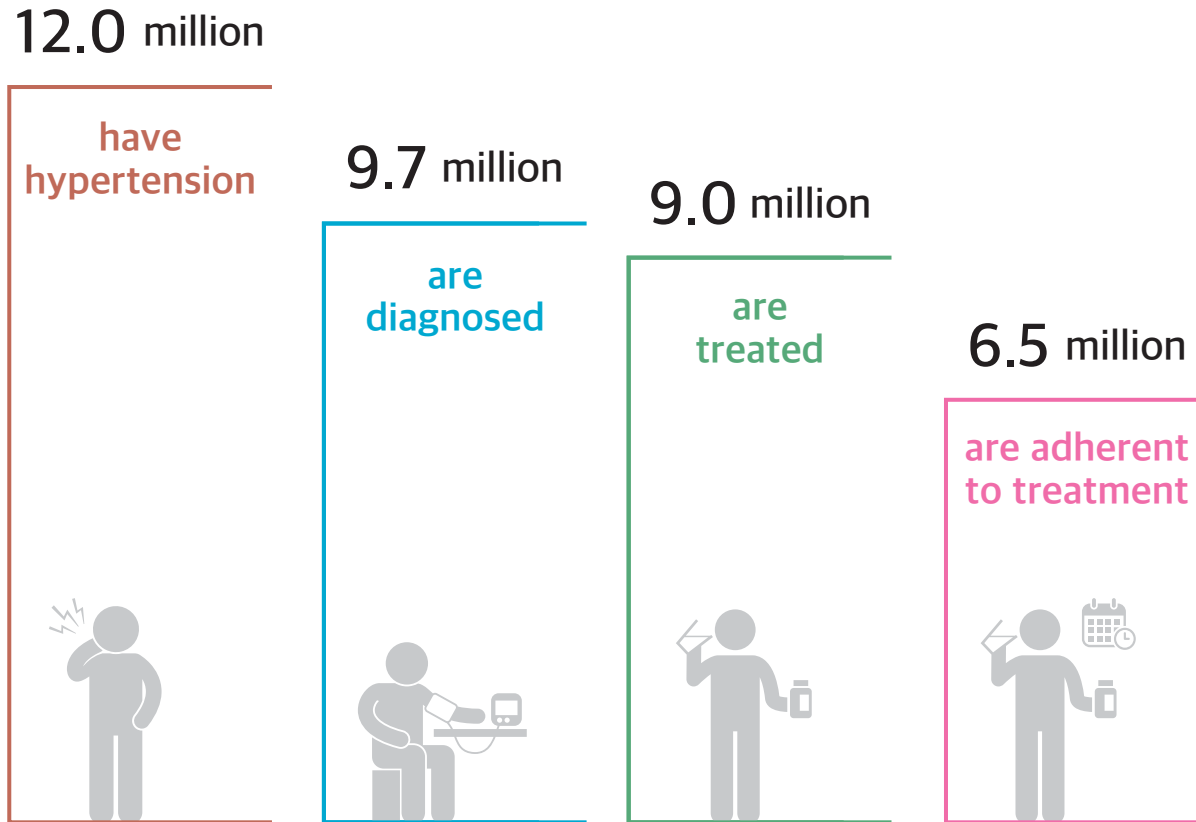



# Summary of population statistics (age 20+)

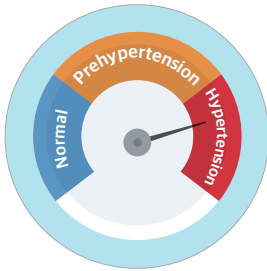

**29%**  
have hypertension

among adults age 20+

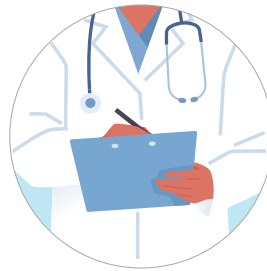

**67%**  
are aware

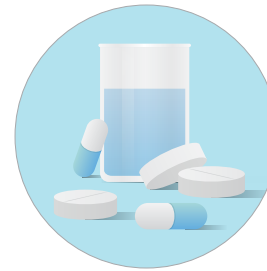

**63%**  
are treated

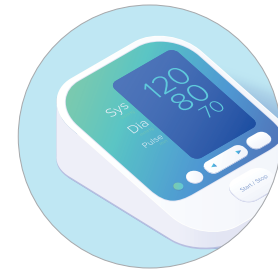

**47%**  
are controlled

among adults age 20+ with hypertension

# Summary of treatment statistics (age 20+)

Among 9.0 million adults treated for hypertension, %

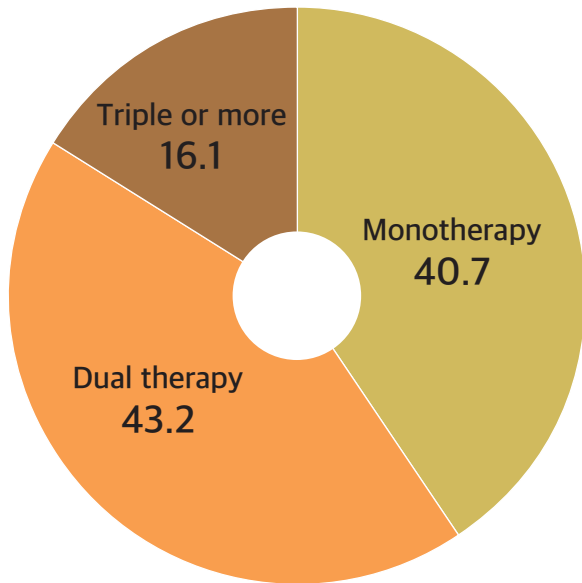

Among 3.7 million adults on monotherapy, %

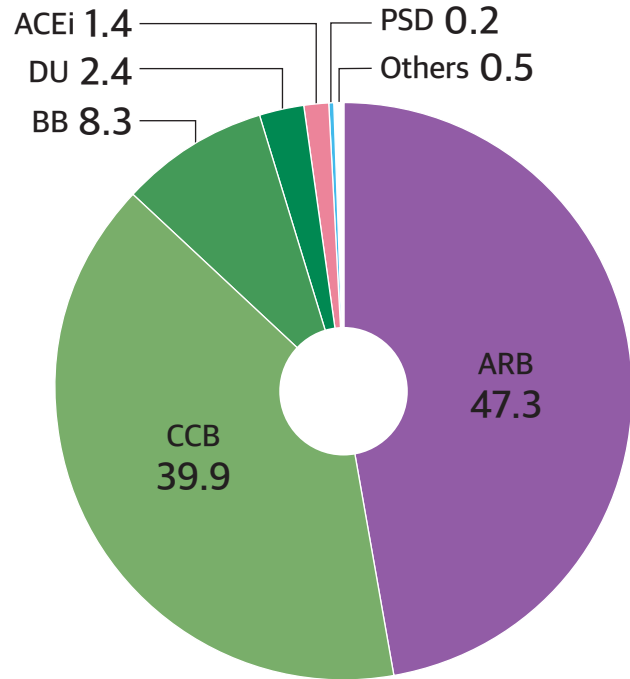

# Summary of treatment statistics (age 20+)

Among 3.9 million adults on dual therapy, %

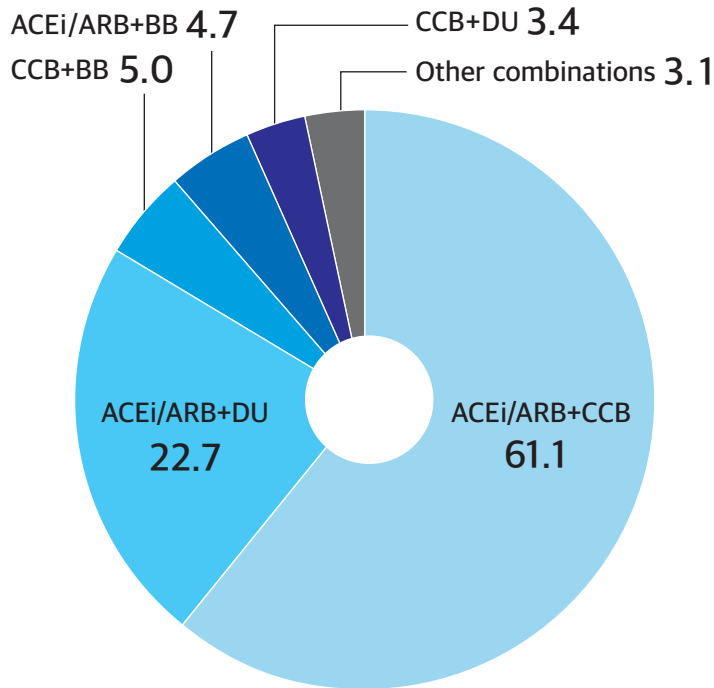

Co-treatment for dyslipidemia and diabetes among 9.0 million adults treated for hypertension, %

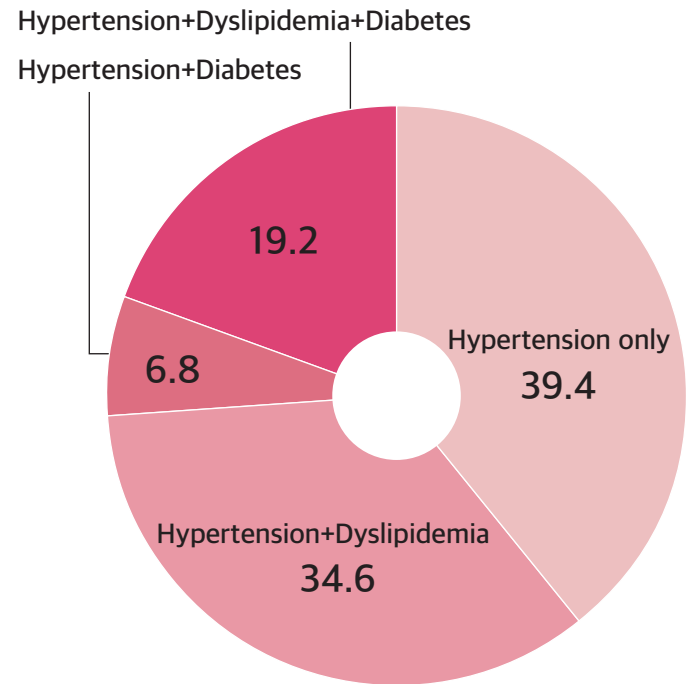

# Changes in population mean blood pressure and prevalence of hypertension

Changes in population mean blood pressure

Changes in hypertension prevalence

Changes in hypertension prevalence by sex and age

# Changes in population mean blood pressure

**118/76 mmHg**  
(age 20+)

116/76 mmHg (age 20+, age-standardized)

119/77 mmHg (age 30+)

117/77 mmHg (age 30+, age-standardized)

Year 2018

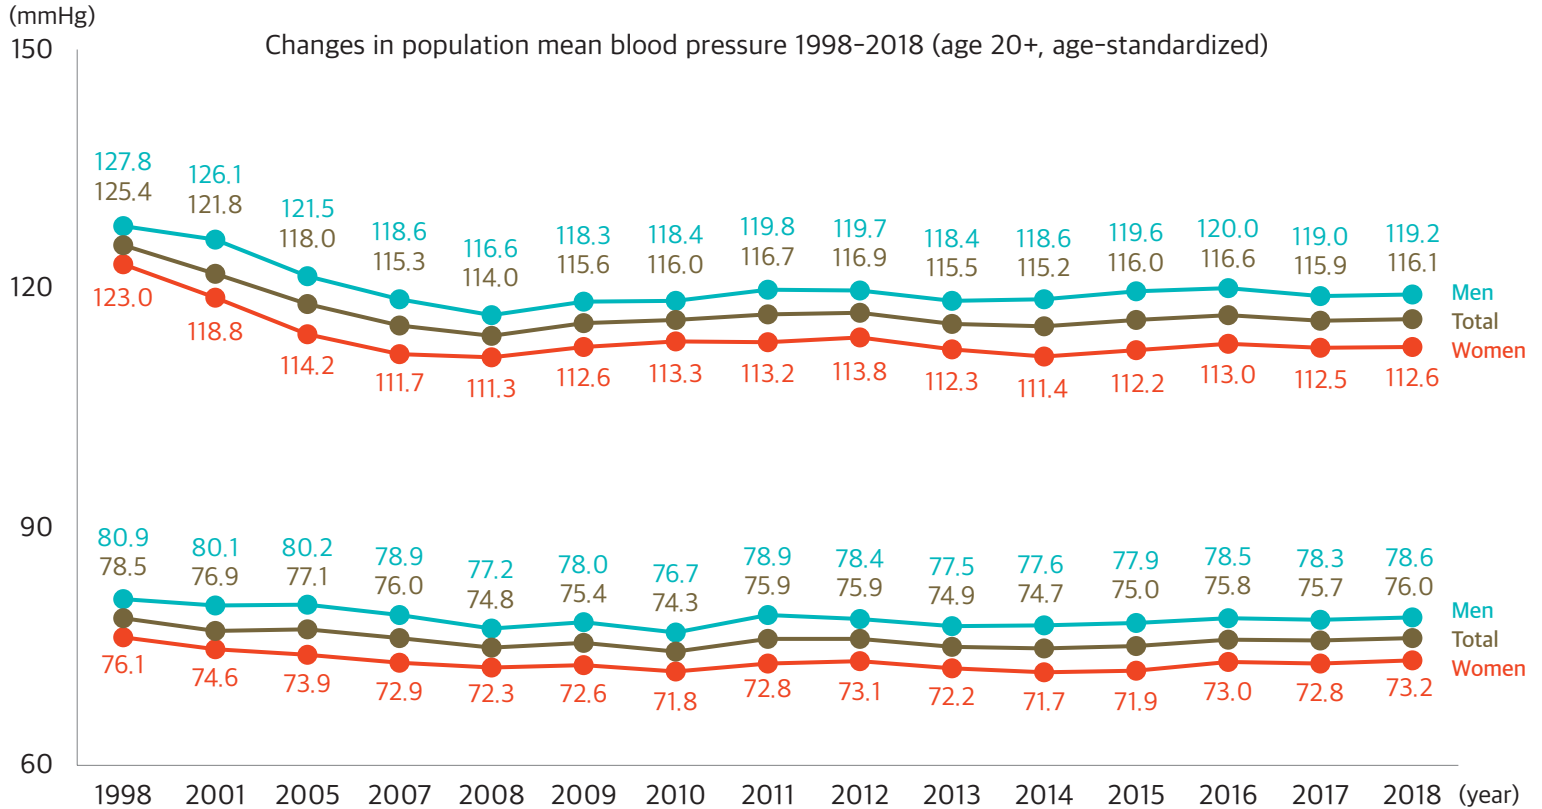



# Changes in hypertension prevalence

**29%** (age 20+)  
 24% (age 20+, age-standardized)  
 33% (age 30+)  
 28% (age 30+, age-standardized)

.....  
 Year 2018

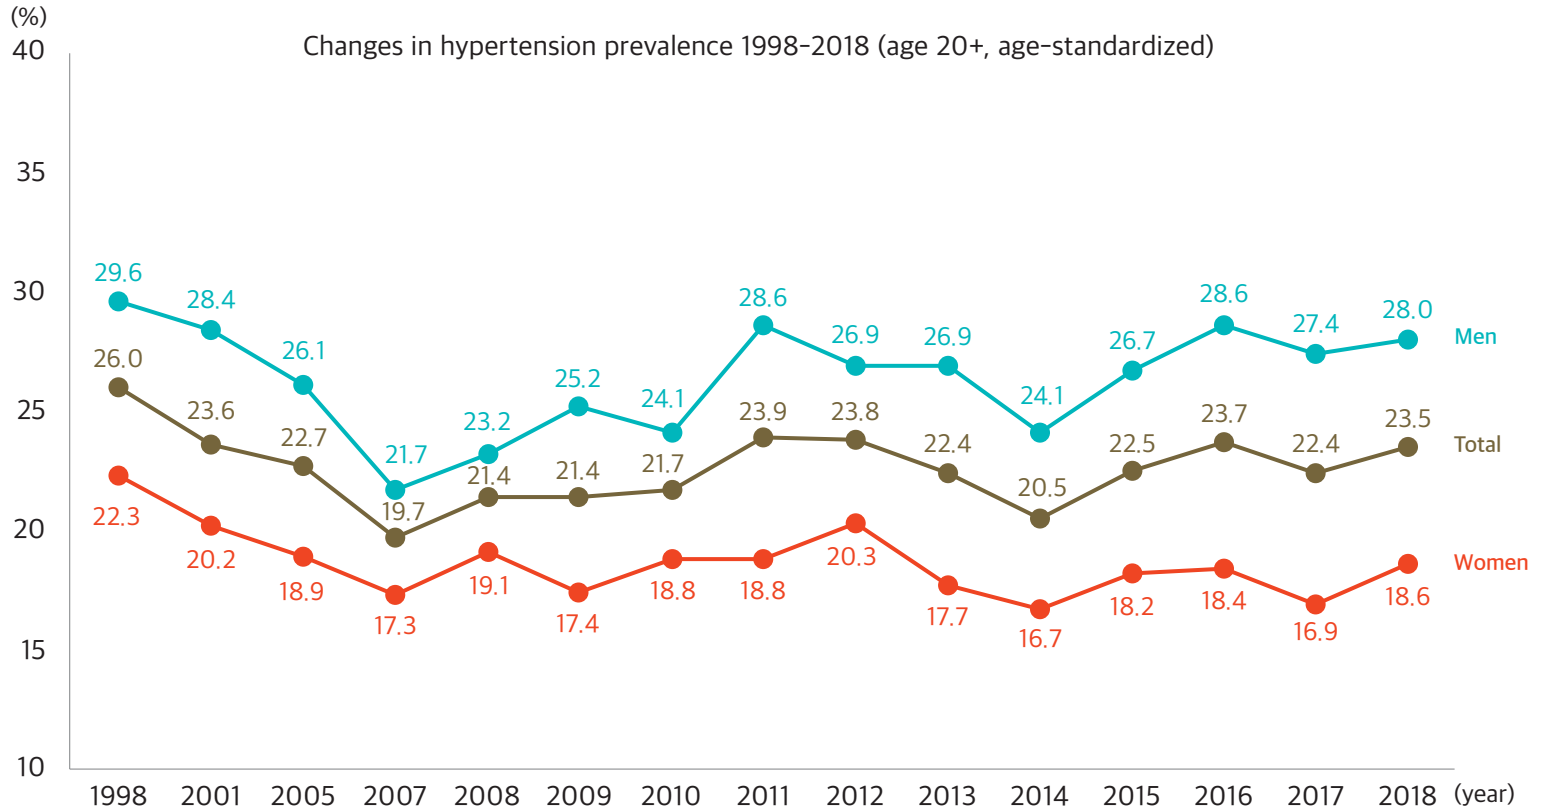

Data source: Korea National Health and Nutrition Examination Survey 1998-2018

# Changes in hypertension prevalence by sex and age

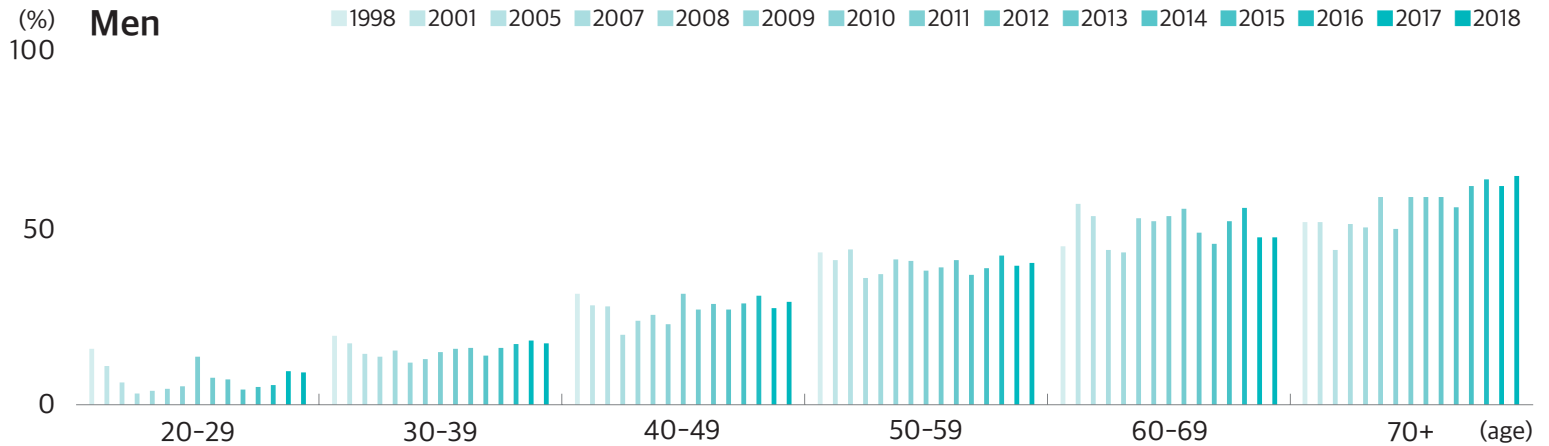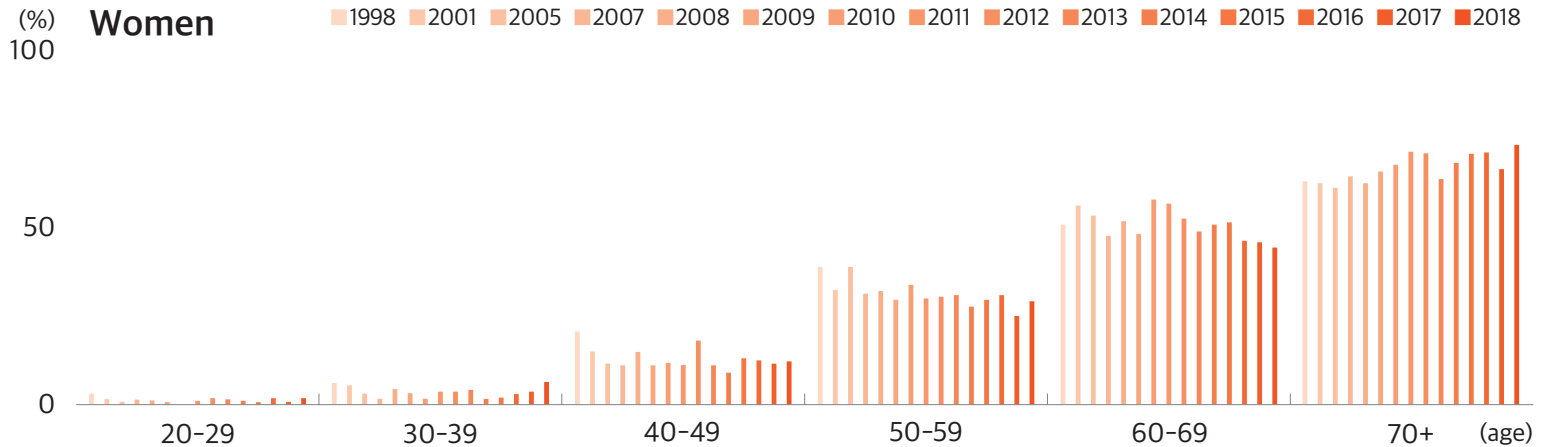

Data source: Korea National Health and Nutrition Examination Survey 1998-2018

## Changes in hypertension management

Changes in awareness rate by sex and age

Changes in treatment rate by sex and age

Changes in control rate (among prevalent) by sex and age

Changes in control rate (among treated) by sex and age

# Changes in awareness rate by sex and age

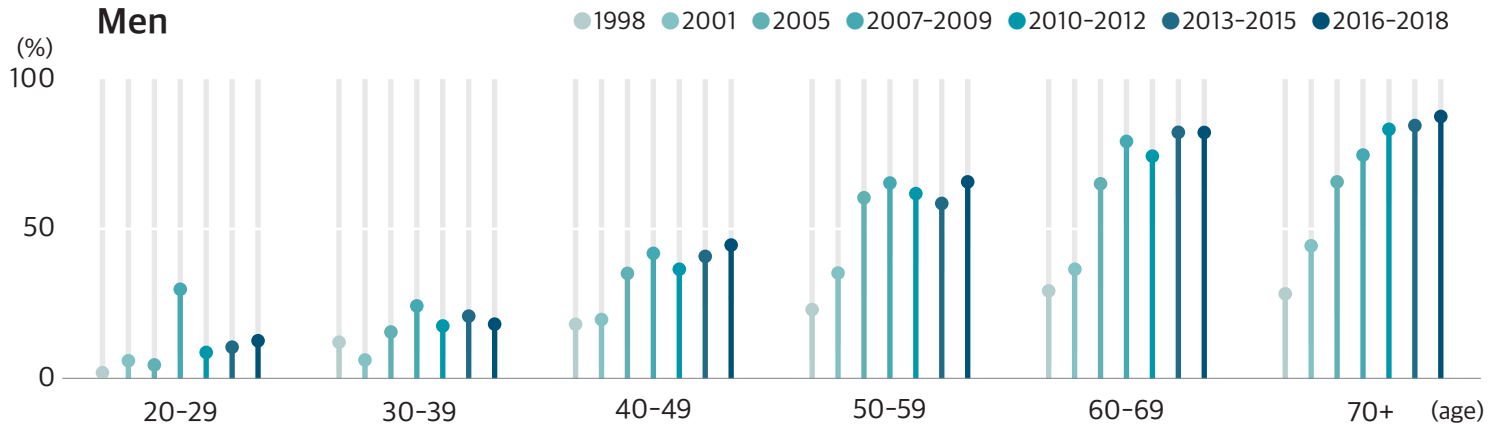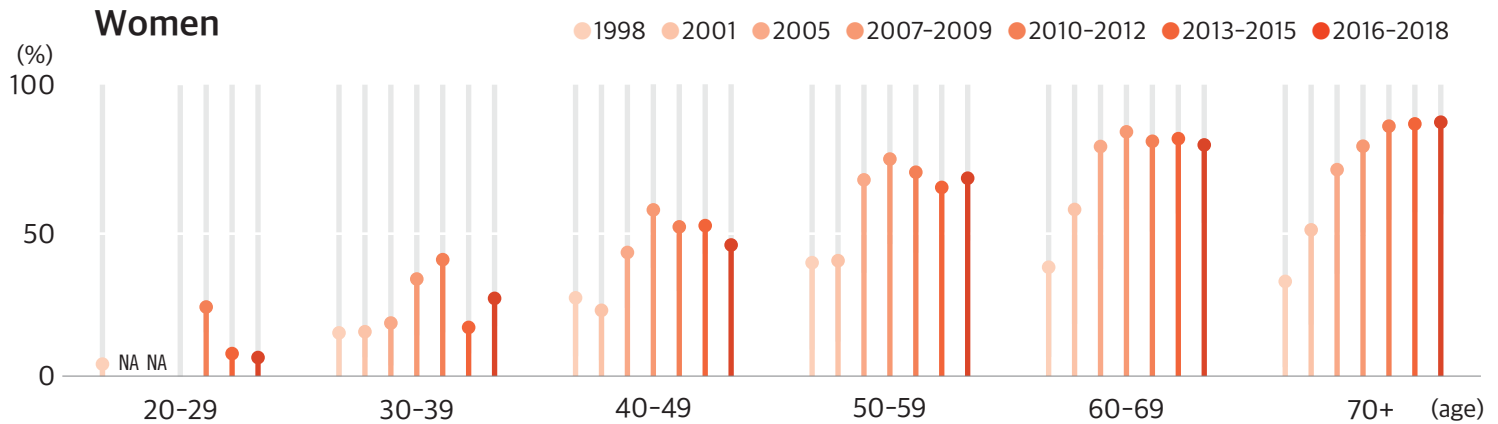

# Changes in treatment rate by sex and age

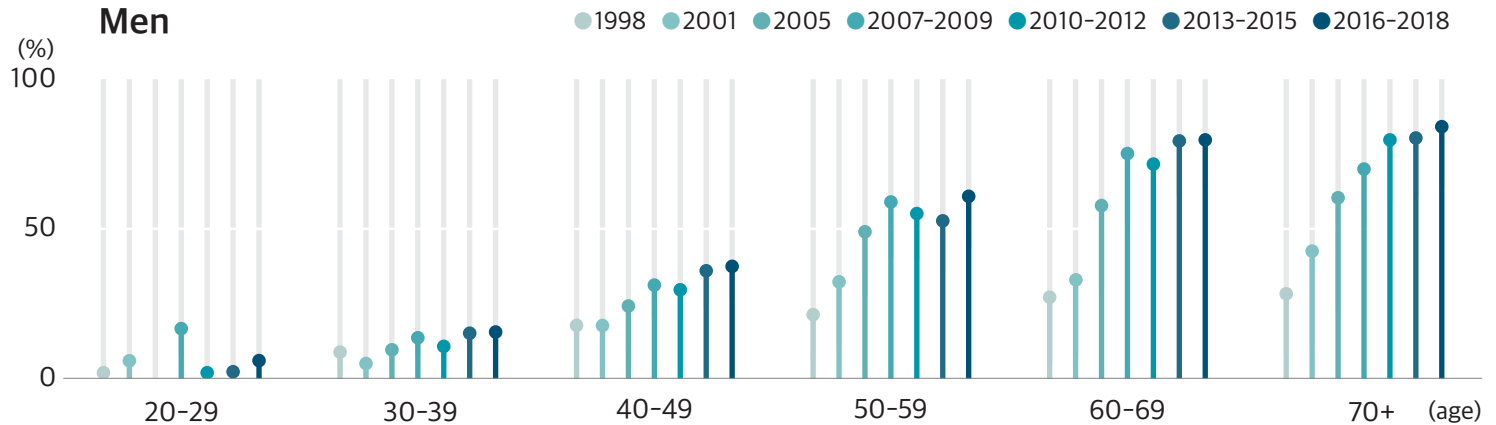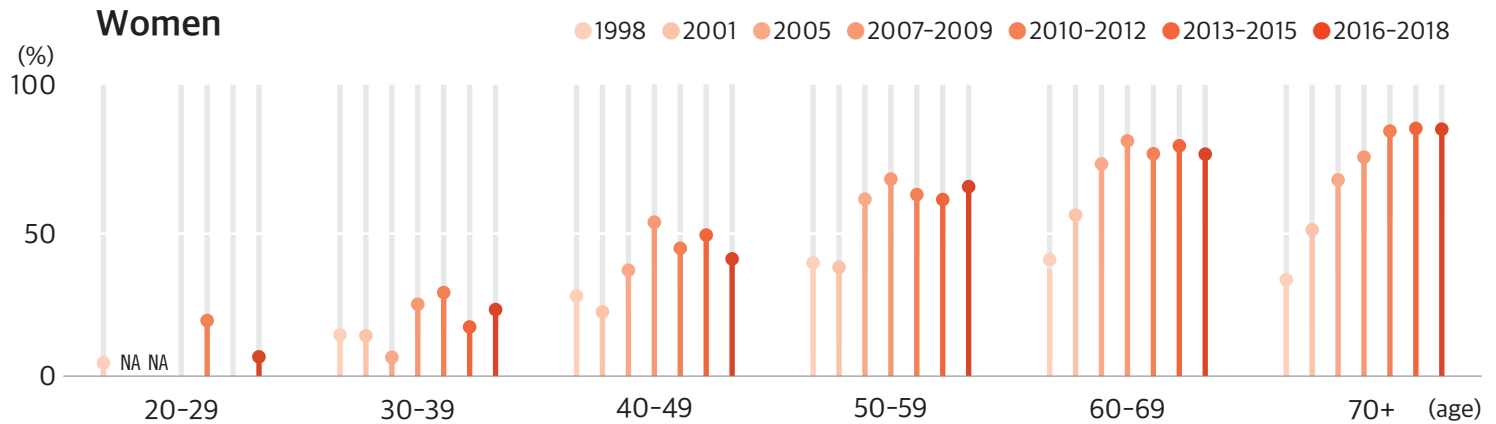



# Changes in control rate (among prevalent) by sex and age

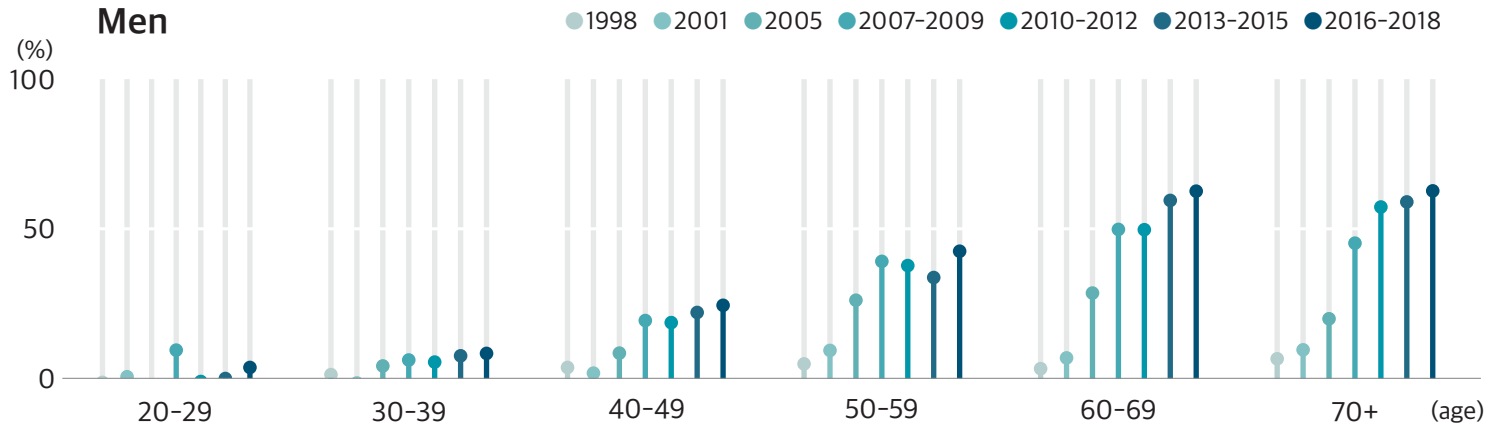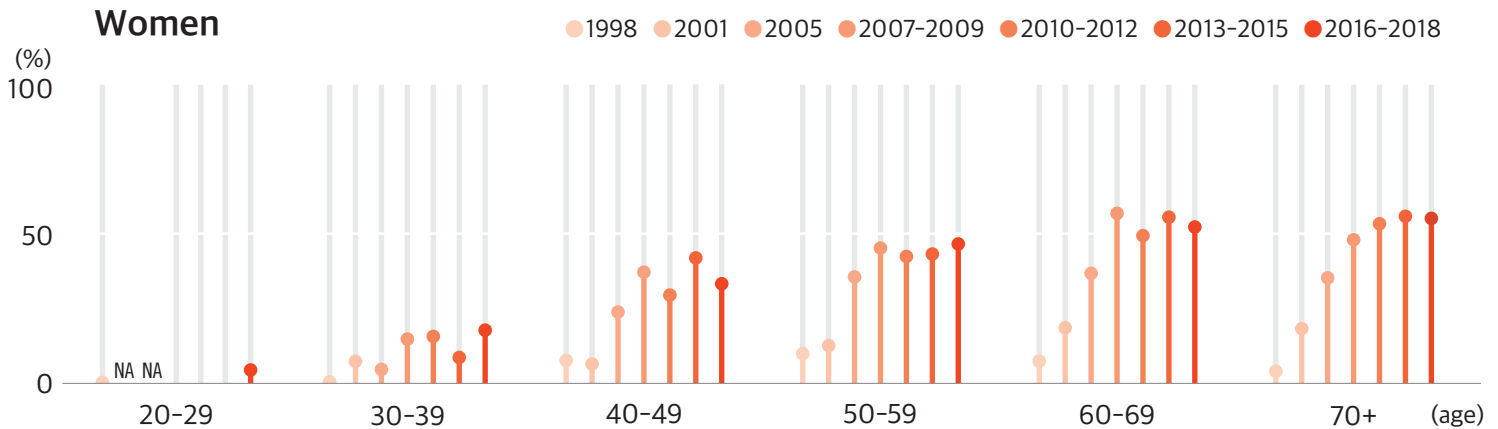

# Changes in control rate (among treated) by sex and age

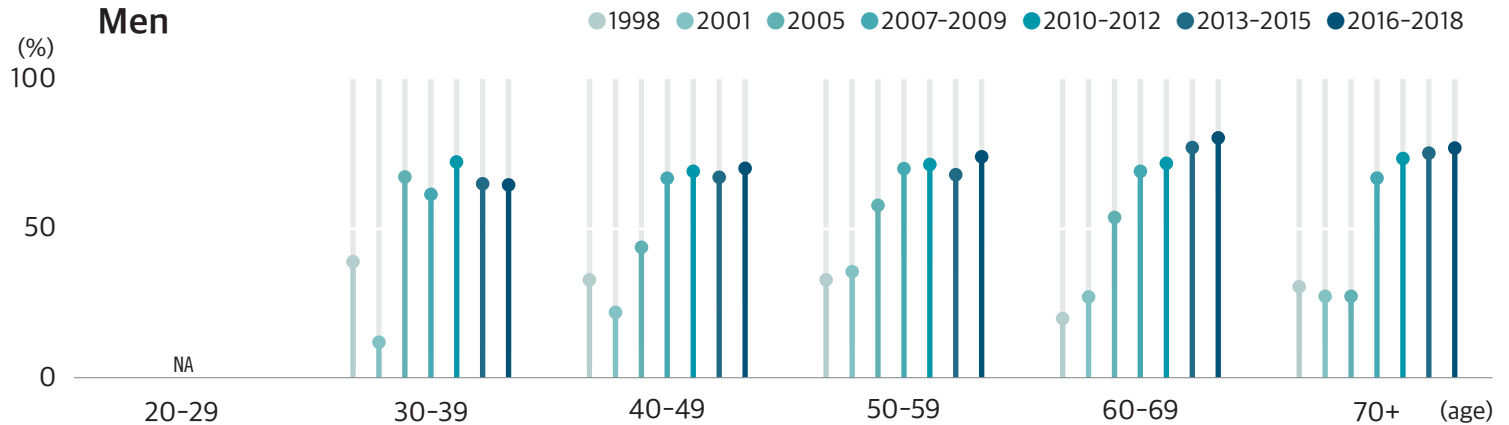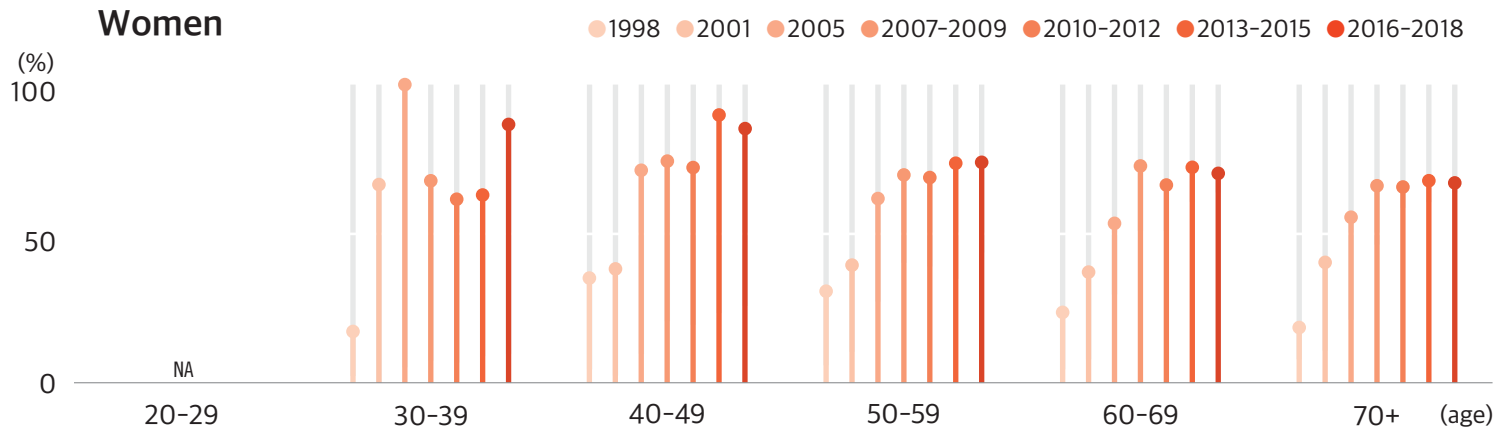

# Healthcare utilization for hypertension

Changes in the number of healthcare users

Changes in co-treatment for dyslipidemia and diabetes

Changes in prescriptions of antihypertensive drugs

Changes in antihypertensive treatment regimen

# Changes in the number of healthcare users (age 20+)

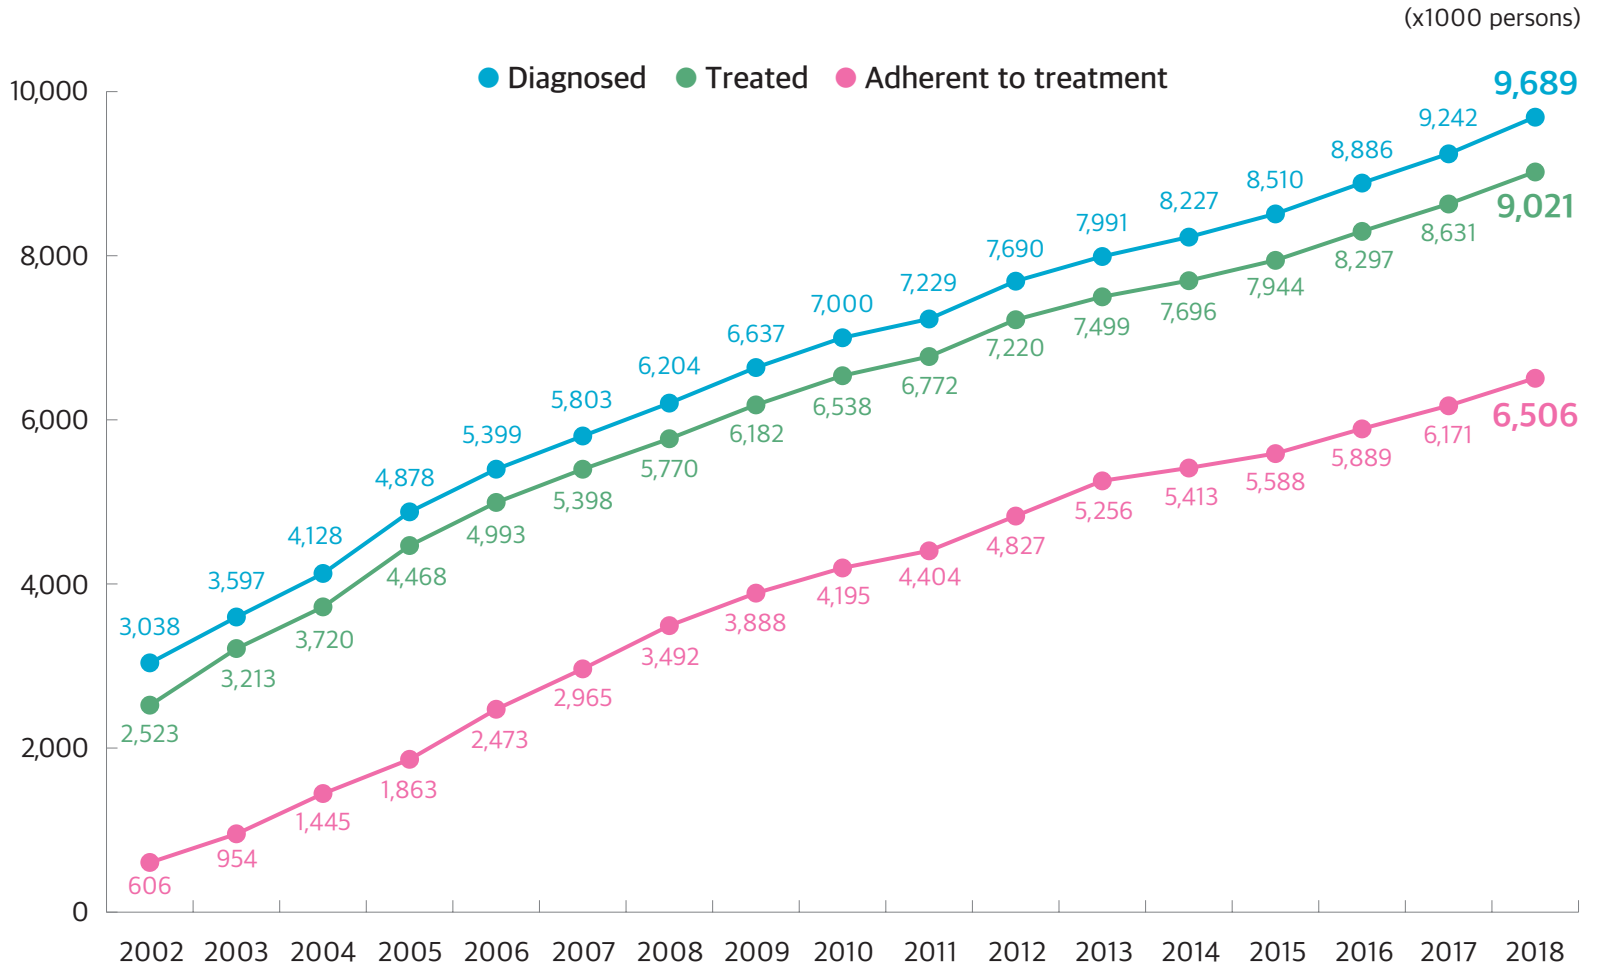

# Changes in co-treatment for dyslipidemia and diabetes (age 20+)

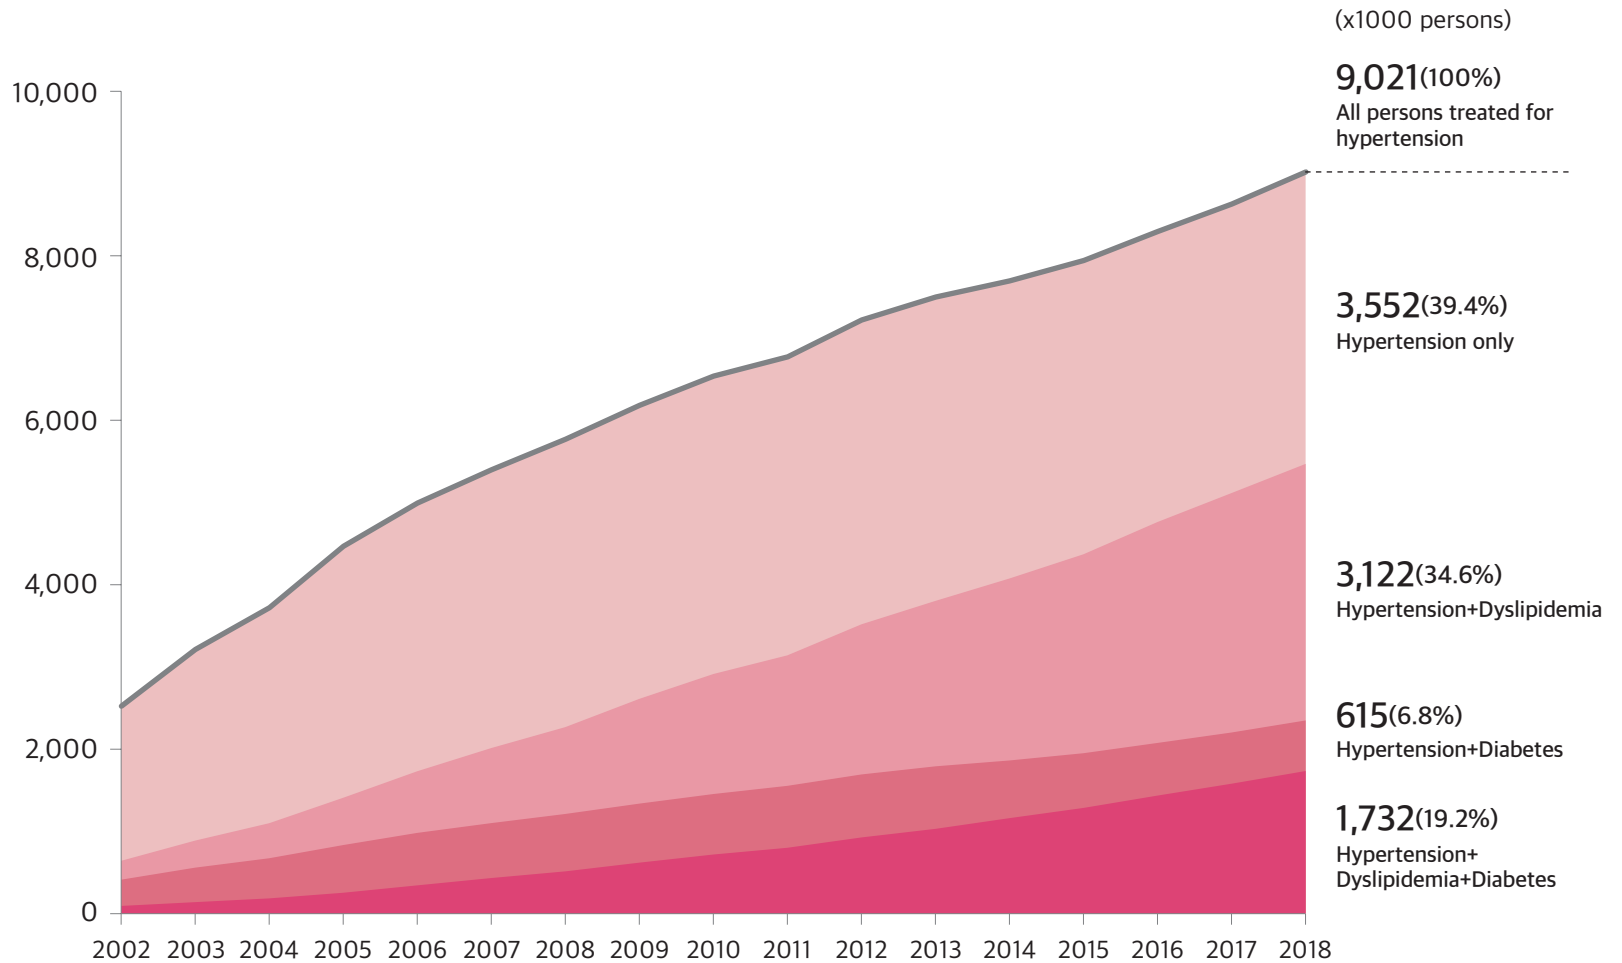



# Changes in prescriptions of antihypertensive drugs (age 20+)

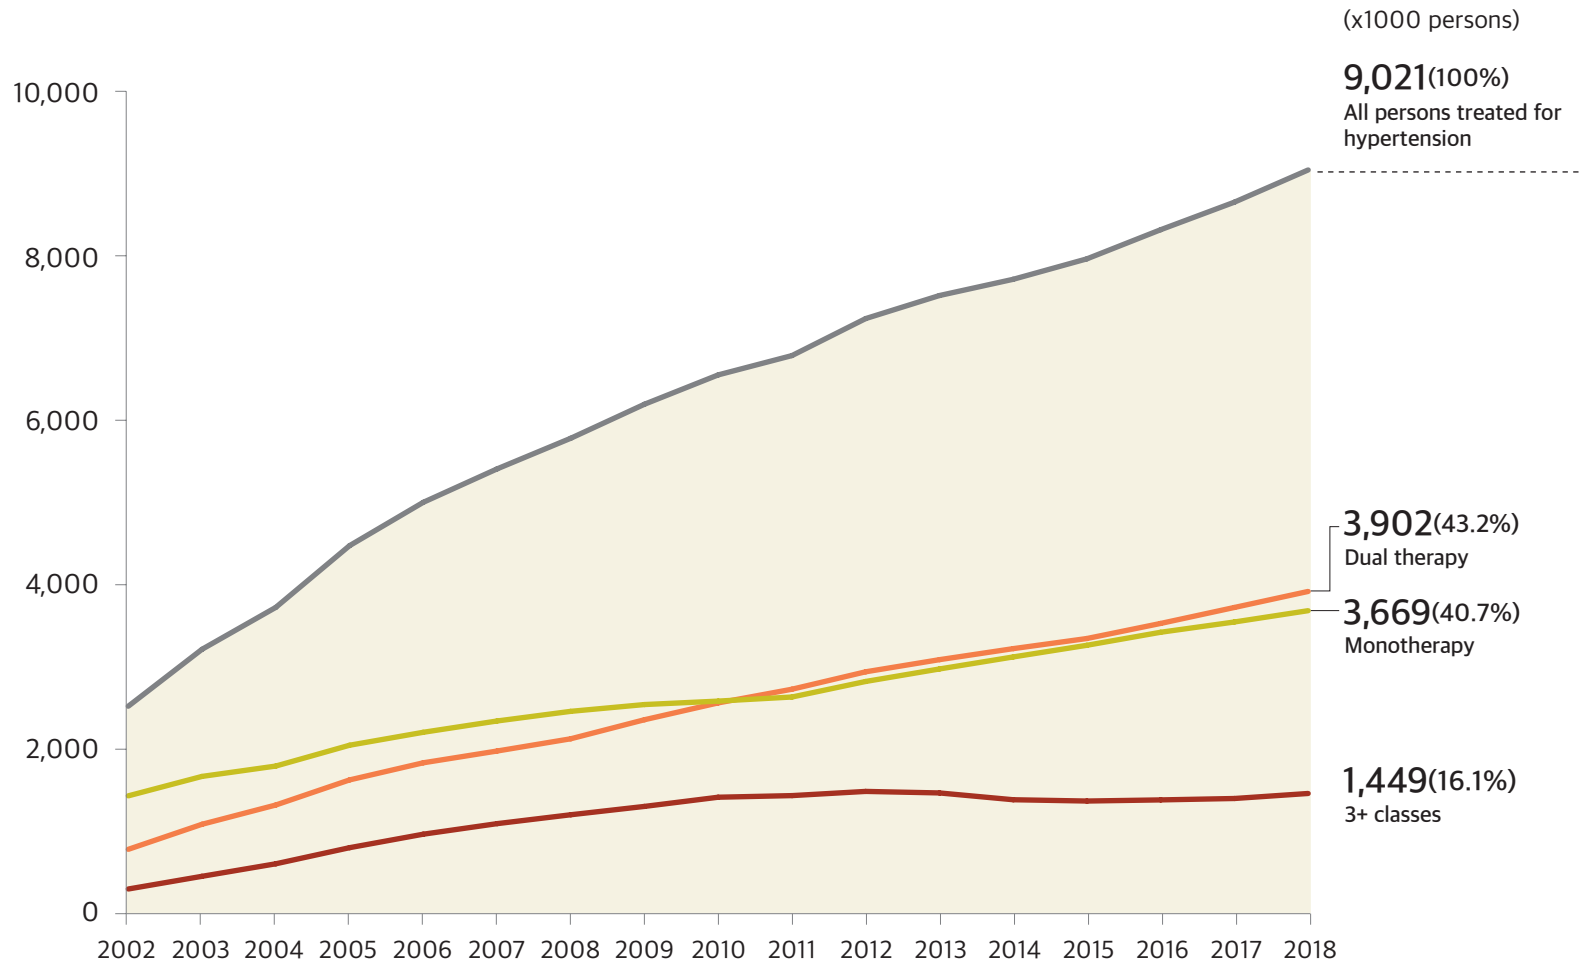

# Changes in prescriptions of antihypertensive drugs (age 20+)

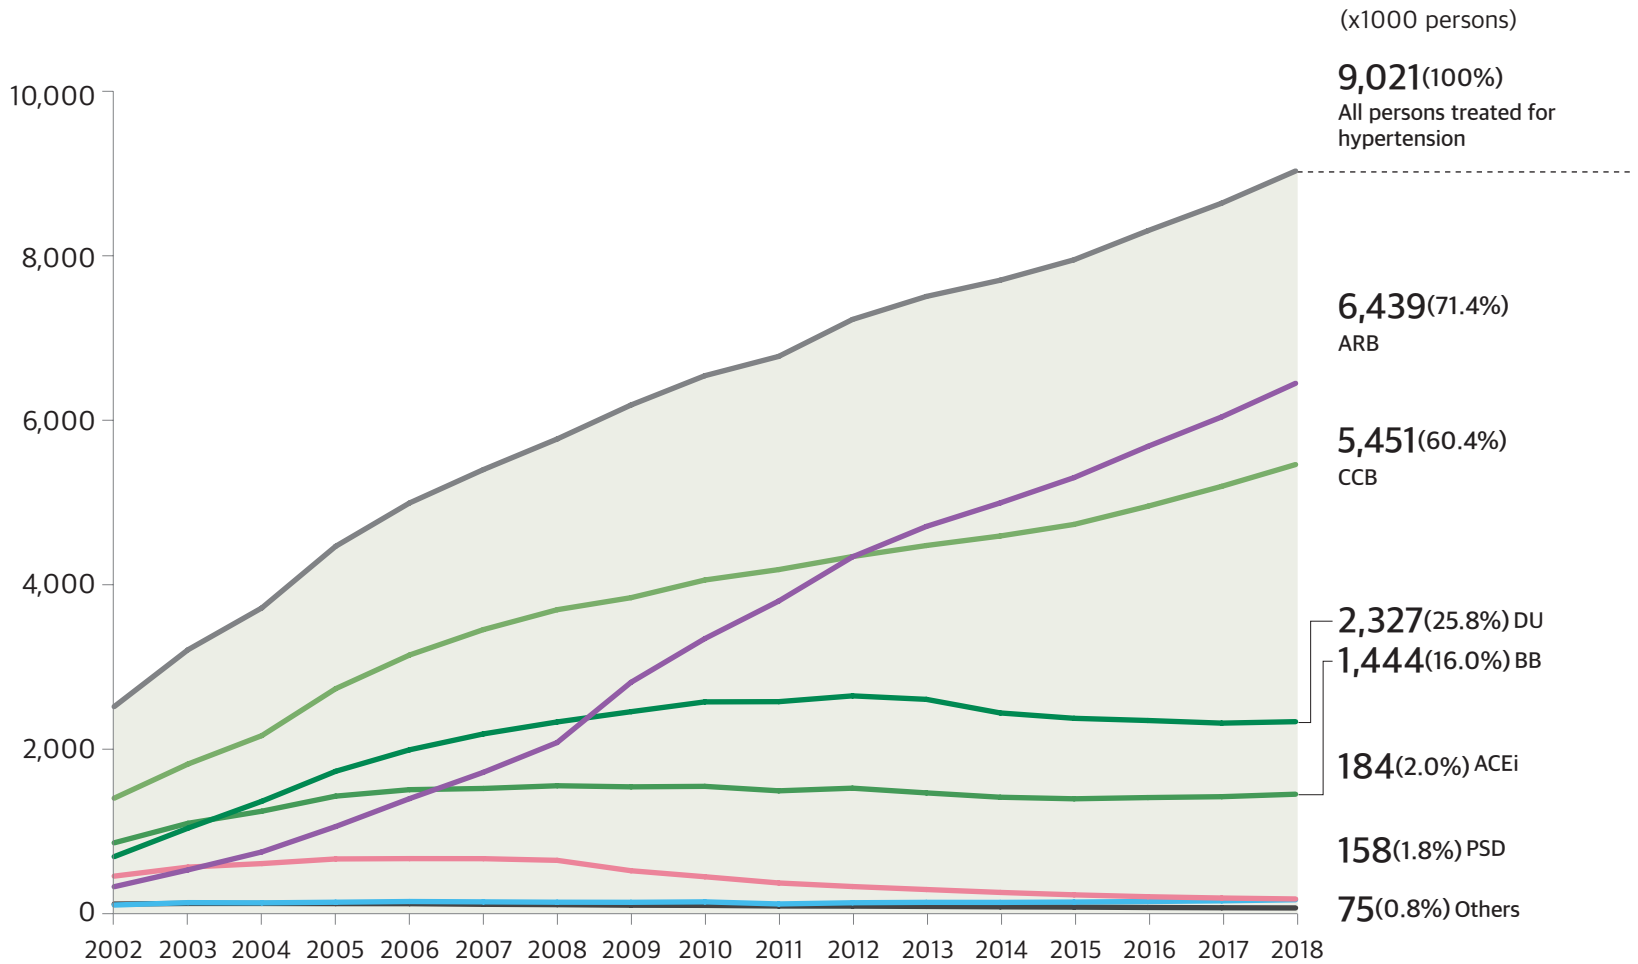

Data source: Korea National Health Insurance Big Data 2002-2018

# Changes in antihypertensive treatment regimen (age 20+)

Among 3.7 million adults on monotherapy, %

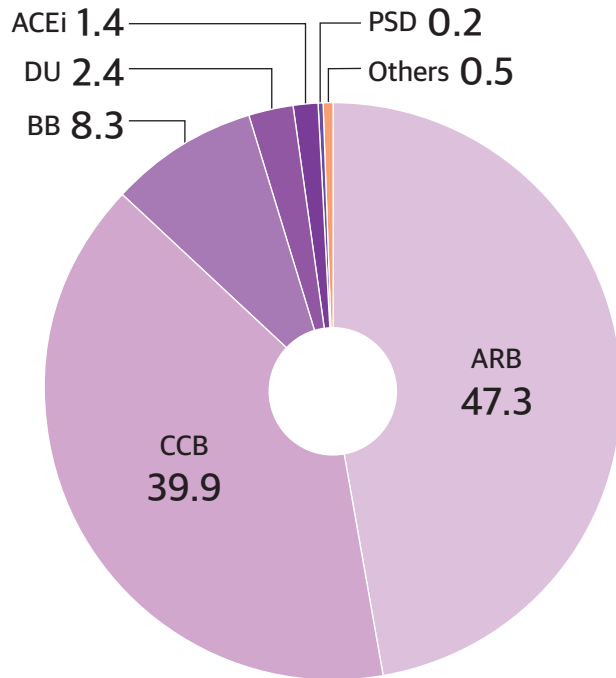

Among 3.9 million adults on dual therapy, %

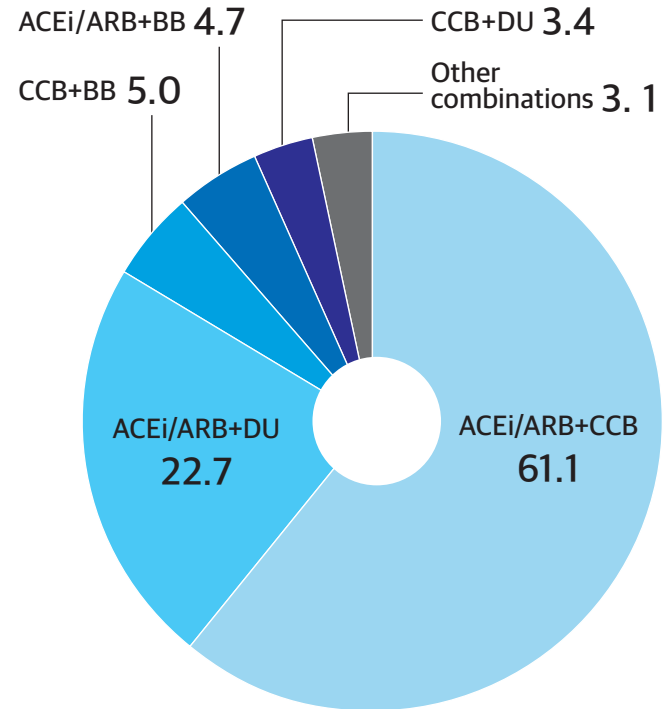

# Changes in antihypertensive treatment regimen (age 20+)

Among 1.2 million adults on triple therapy, %

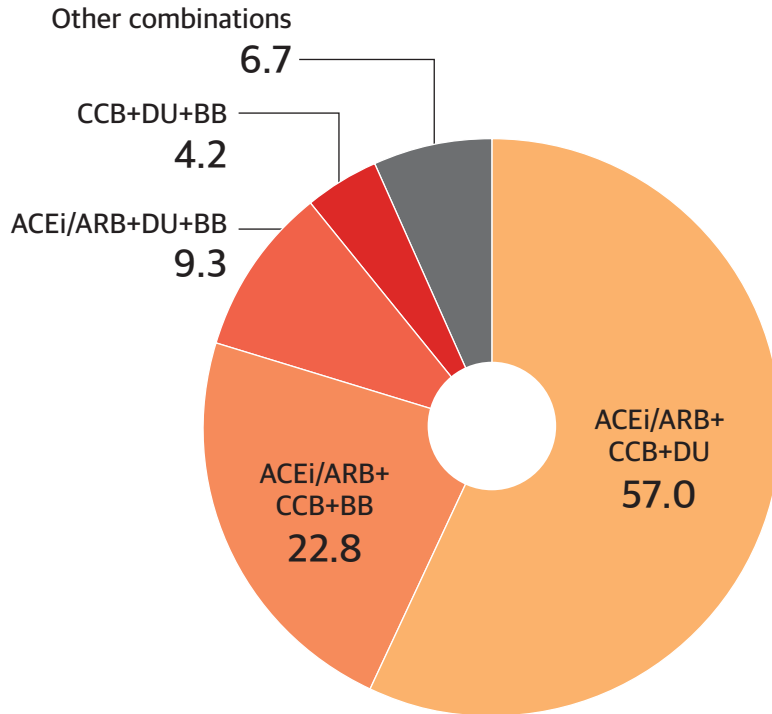

Among 0.2 million adults on 4 classes, %

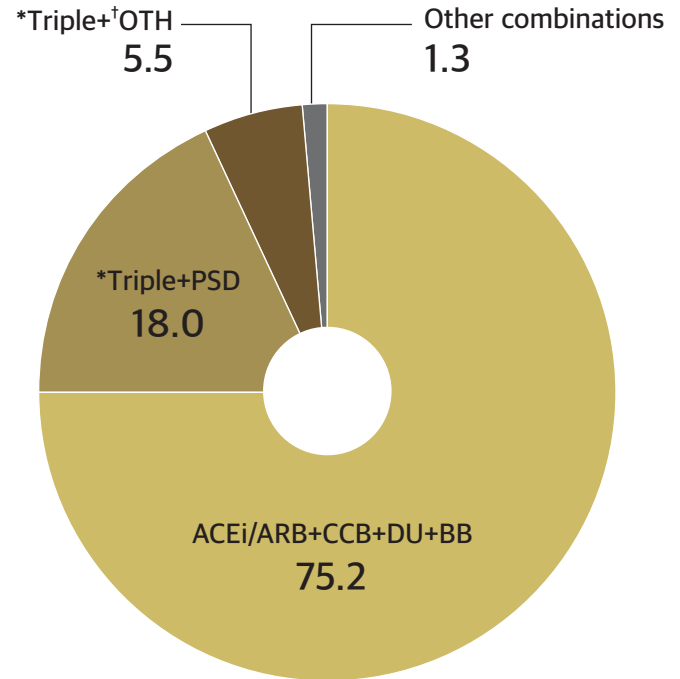

\*Triple=three of the ACEi/ARB, CCB, DU, or BB

†OTH=alpha-blockers, vasodilators, etc.

## **Management of hypertension in young adults**

Summary of hypertension statistics in young adults

Changes in awareness rate in young adults

Changes in treatment rate in young adults

Changes in adherence rate (among diagnosed) in young adults

Changes in adherence rate (among treated) in young adults

Current management status in young adults



## Summary of hypertension statistics in young adults (age 20-39)

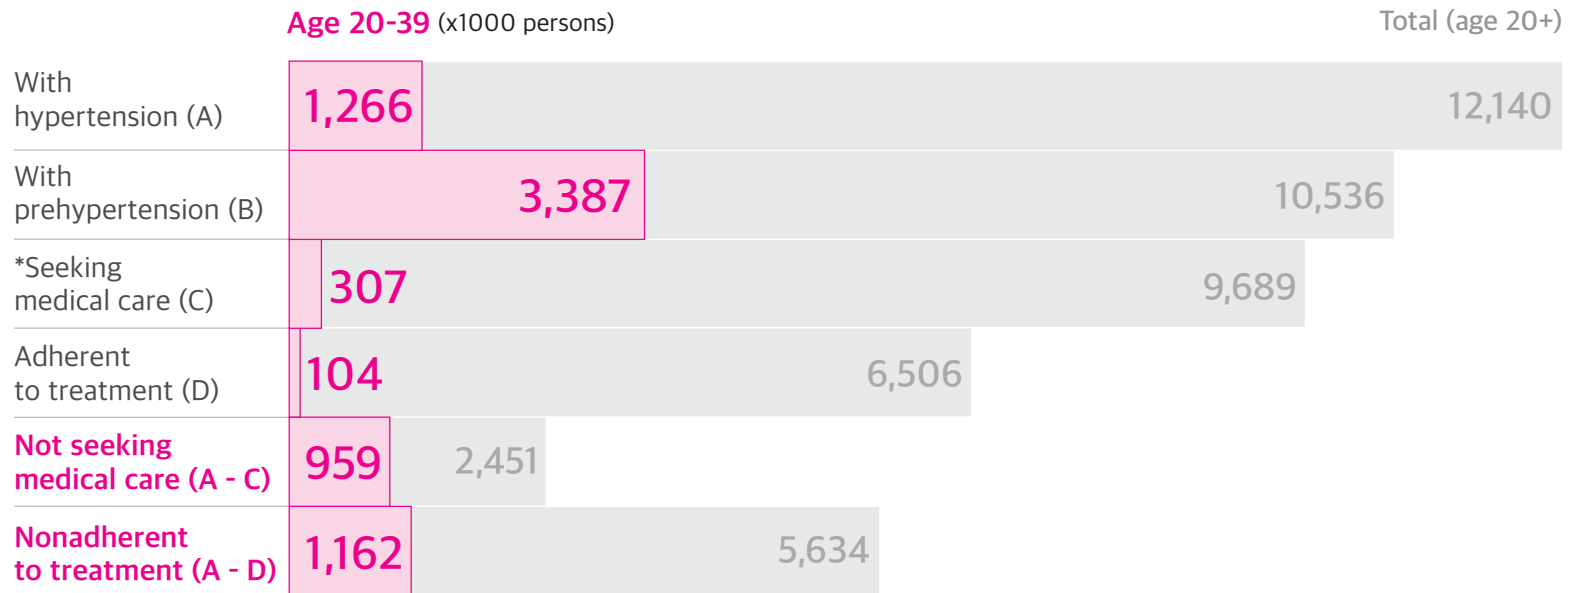

\*≥1 health insurance claim for hypertension diagnosis (ICD-10: I10)

# Changes in awareness rate in young adults

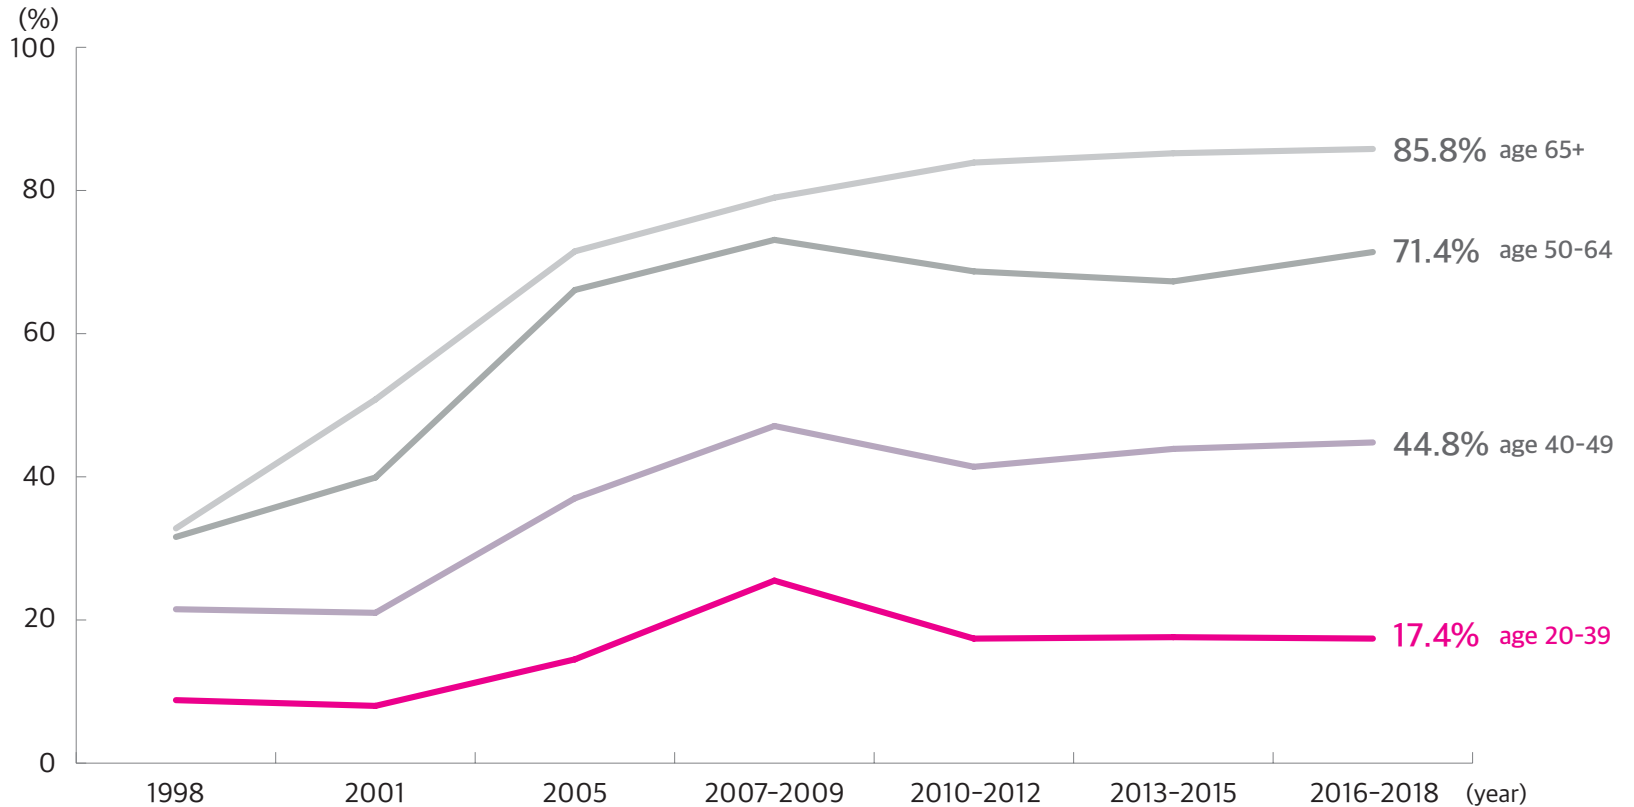

# Changes in treatment rate in young adults

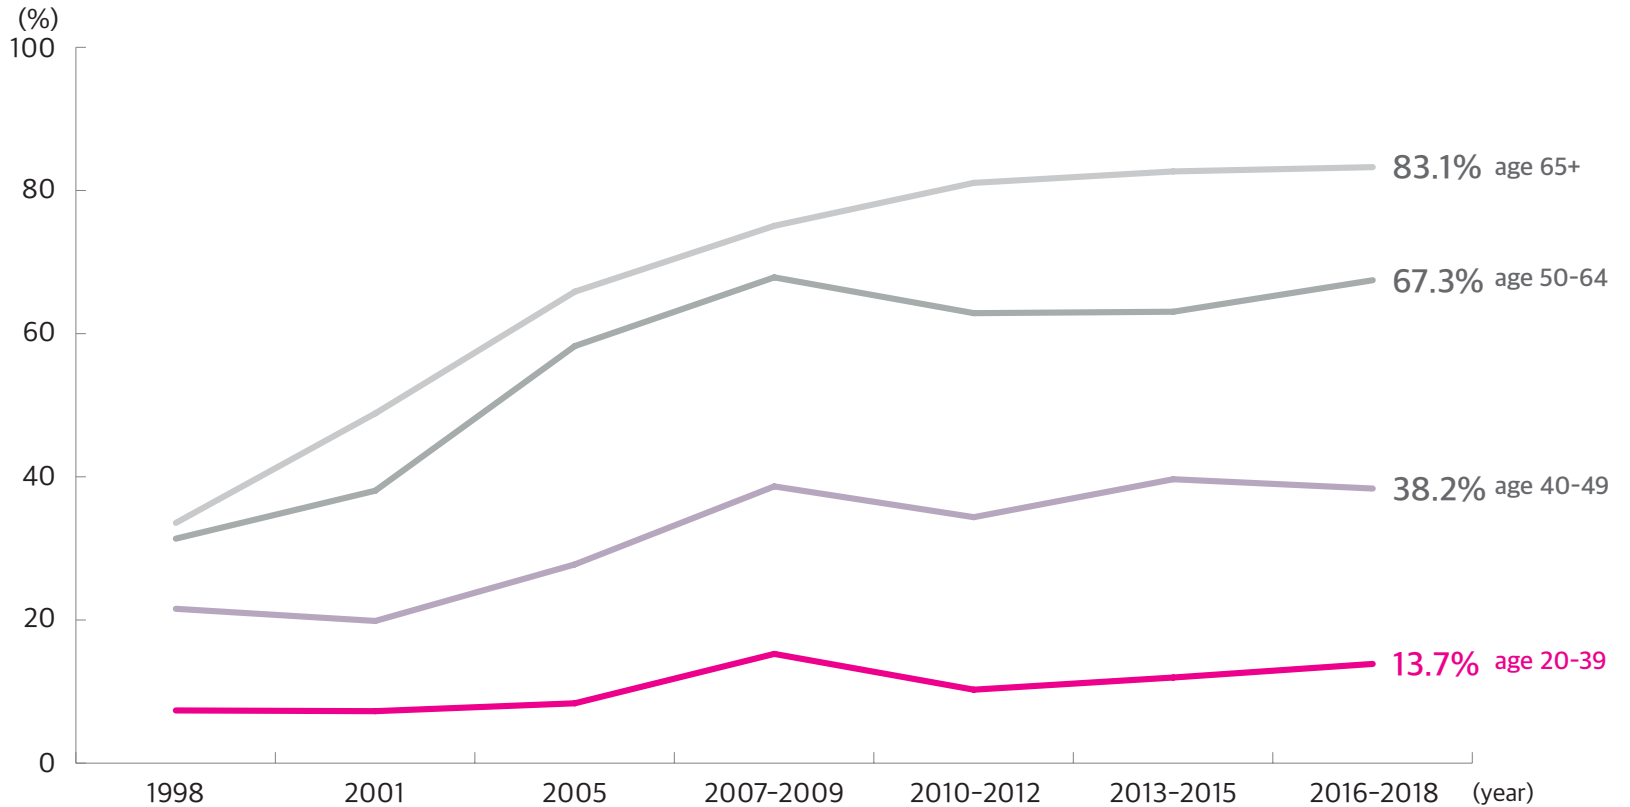

## Changes in adherence rate (among diagnosed) in young adults

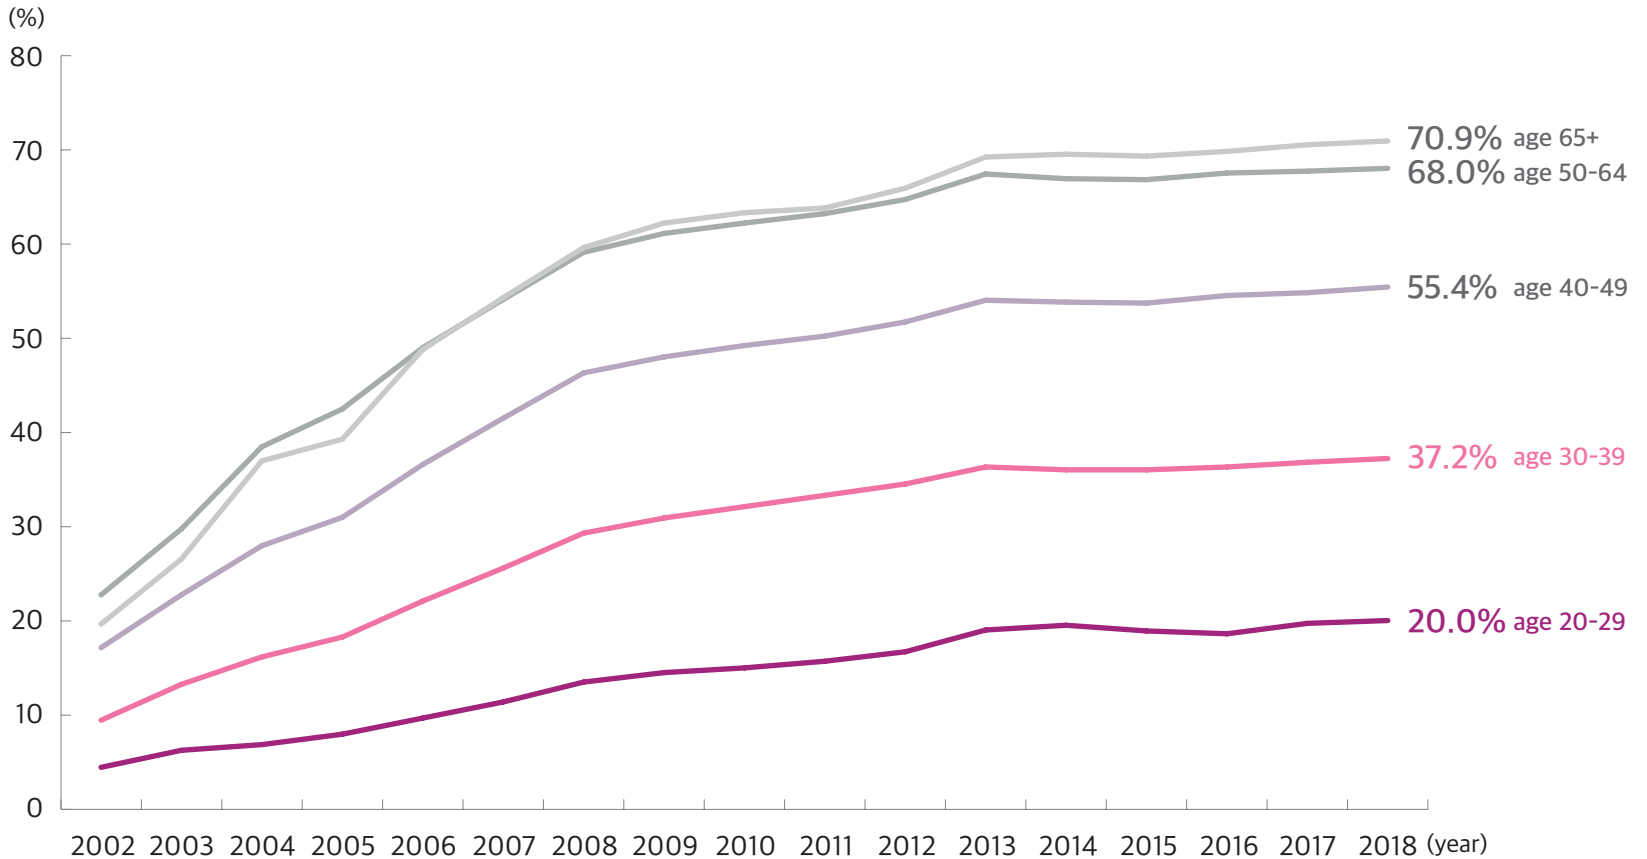

## Changes in adherence rate (among treated) in young adults

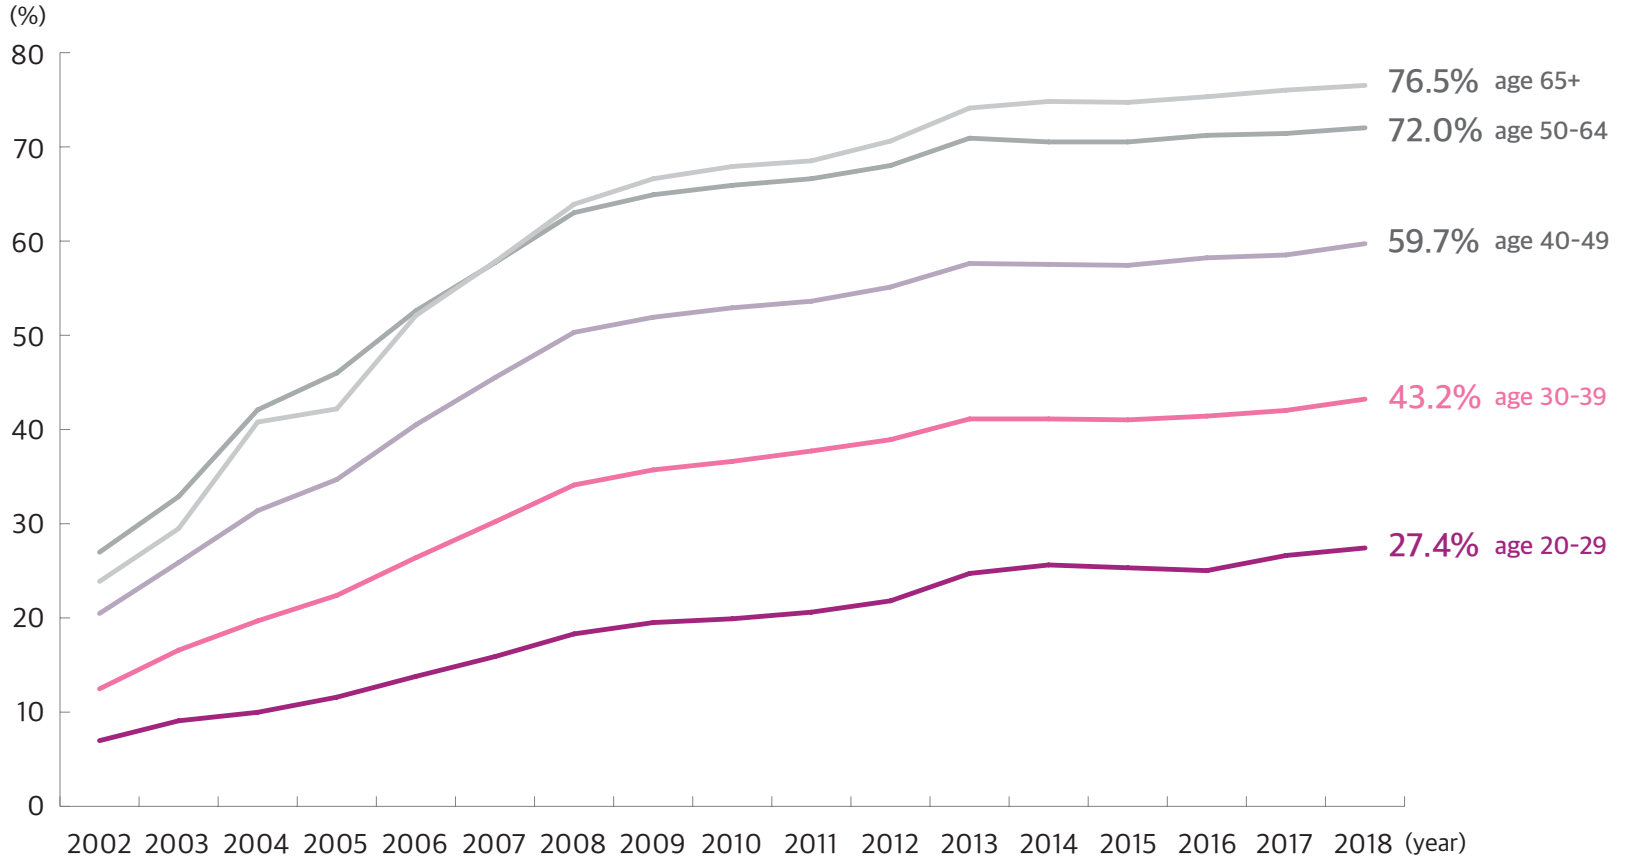

# Current management status in young adults

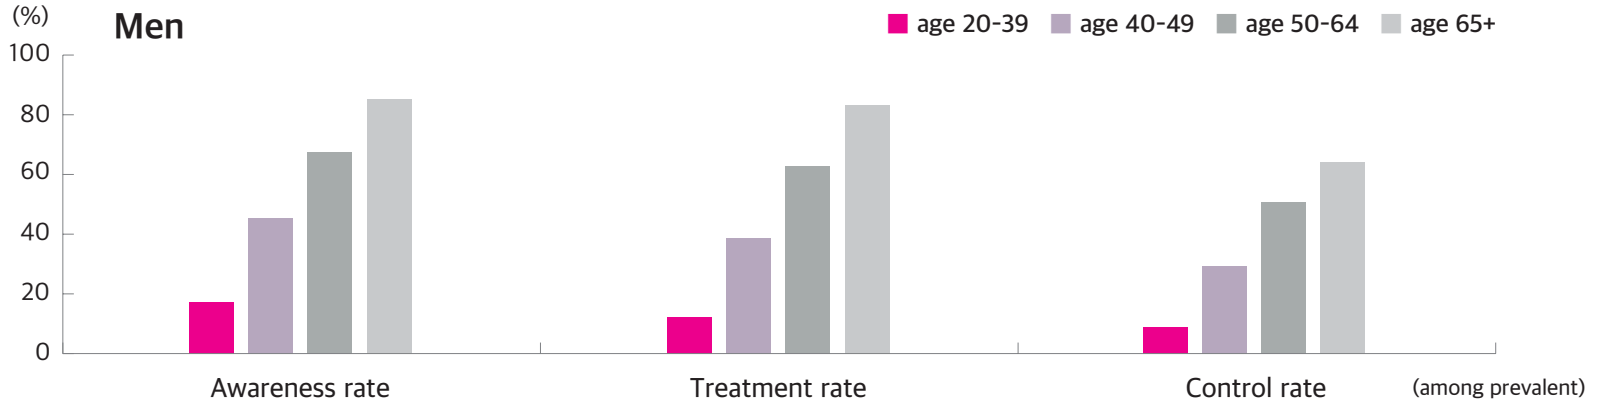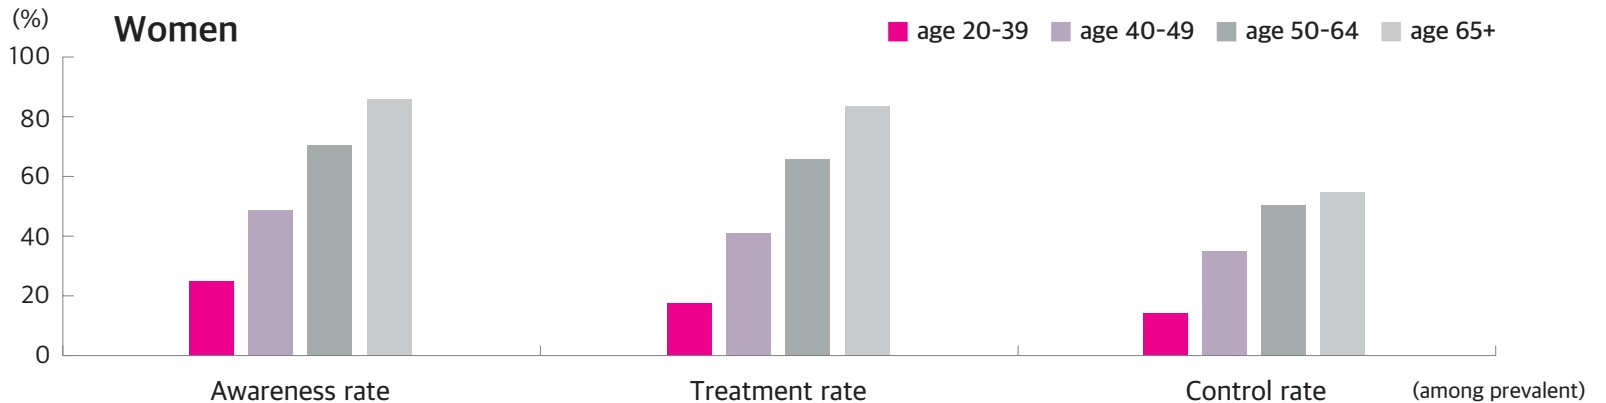

# Current management status in young adults

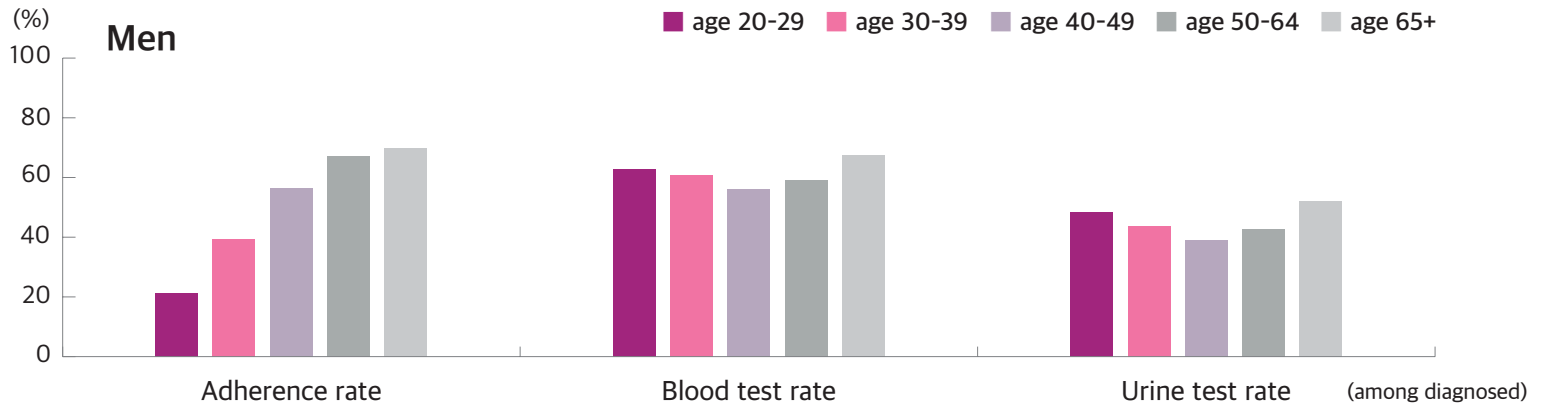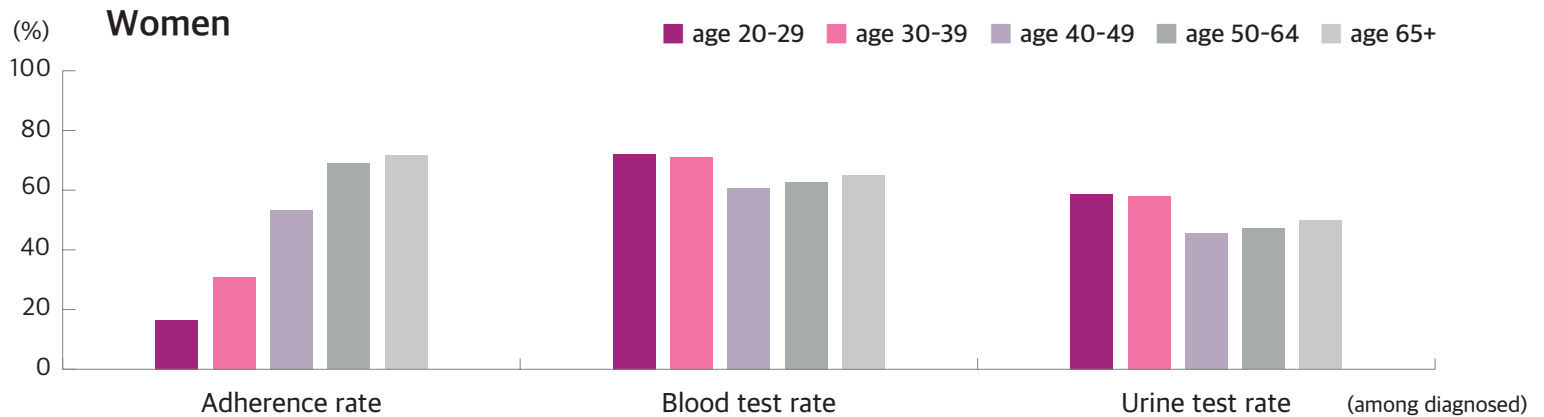

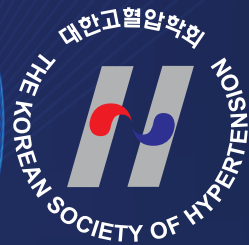

This fact sheet will be published on *Clinical Hypertension*,  
the official journal of The Korean Society of Hypertension

[www.koreanhypertension.org](http://www.koreanhypertension.org)
